# Supplementary material for: Comparative and Phylogenetic Analysis of the Complete Chloroplast Genomes of Six Polygonatum Species (Asparagaceae)
Source: Research Square preprint supplement (doi:10.21203/rs.3.rs-1669614/v1), 2022-05-31
Supplement: Supplementary file 1 [file 3406767d01faeb917f8cbf3f.docx]

**Additional file 1: Table S1.** Information of the plastome ­sequences­ used for understanding the phylogenetic relationship about *Polygonatum* and *Heteropolygonatum*. (xls­­)­­­­­­­­­

**Additional file 2: Table S2.** Comparison of the kinds and length of introns among nine chloroplast genome sequences. (xls­­)­­­­­­­­­

**Additional file 3: Table S3.** Relative synonymous codon usage (RSCU) of the seven *Polygonatum* and two *Heteropolygonatum*. (xls)

**Additional file 4: Table S4.** Repeats types detected in the nine cp genomes. (doc); **Table S5.** Length of repeats detected in the nine cp genomes. (doc); **Table S6.** Distribution of repeats in functional regions detected in the nine cp genomes. (doc); **Table S7.** Distribution of repeats detected in regions of the nine cp genomes. (doc)

**Additional file 8: Table S8.** The type of SSRs in the cp genome of *Polygonatum* and its related species. (doc)

**Additional file 9: Table S9.** The units of SSRs in the cp genome. (doc)

**Additional file 10: Table S10.** The region of SSRs in the cp genome. (doc)

**Additional file 11: Table S11.** Positive selected sites detected in the cp genome of *Polygonatum* + *Heteropolygonatum.* (doc)
