# Supplementary material for: Comparative and Phylogenetic Analysis of the Complete Chloroplast Genomes of Six Polygonatum Species (Asparagaceae)
Source: Research Square preprint supplement (doi:10.21203/rs.3.rs-1669614/v1), 2022-05-31
Supplement: Supplementary file 6 [file f3649c655bee77d9ed03344a.xlsx]

## Sheet: Sheet1
Table S2. Comparison of the kinds and length of introns among nine chloroplast genome sequences
	Genes with one intron																Genes with two introns
	atpF	ndhA	ndhB	petB	petD	rpl2	rpl16	rps16	rps12	rpoC1	trnA-UGC	trnG-UCC	trnI-GAU	trnK-UUU	trnL-UAA	trnV-UAC	clpP		ycf3
Heteropolygonatum acuminatifolium	786 bp	1082 bp	694 bp	727 bp	746 bp	664 bp	1039 bp	877 bp	542 bp	740 bp	824 bp	701 bp	941 bp	2582 bp	533 bp	596 bp	810 bp	650 bp	751 bp	738 bp
Heteropolygonatum alternicirrhosum	789 bp	1077 bp	694 bp	752 bp	746 bp	664 bp	1053 bp	865 bp	542 bp	739 bp	824 bp	701 bp	941 bp	2579 bp	533 bp	596 bp	811 bp	653 bp	751 bp	744 bp
Heteropolygonatum ginfushanicum	781 bp	1074 bp	694 bp	752 bp	746 bp	664 bp	1039 bp	865 bp	542 bp	736 bp	824 bp	701 bp	941 bp	2578 bp	533 bp	596 bp	810 bp	650 bp	749 bp	744pb
Polygonatum campanulatum	789 bp	1070 bp	694 bp	751 bp	751 bp	664 bp	1069 bp	867 bp	542 bp	739 bp	824 bp	702 bp	941 bp	2575 bp	533 bp	596 bp	809 bp	646 bp	746 bp	744 bp
Polygonatum cirrhifolium	781 bp	1076 bp	694 bp	751 bp	751 bp	664 bp	1051 bp	866 bp	542 bp	739 bp	824 bp	702 bp	941 bp	2572 bp	532 bp	596 bp	808 bp	648 bp	749 bp	738 bp
Polygonatum curvistylum	781 bp	1076 bp	694 bp	750 bp	751 bp	664 bp	1042 bp	867 bp	542 bp	739 bp	824 bp	702 bp	941 bp	2572 bp	533 bp	596 bp	808 bp	650 bp	750 bp	738 bp
Polygonatum cyrtonema	781 bp	1081 bp	694 bp	738 bp	746 bp	664 bp	1055 bp	865 bp	542 bp	741 bp	824 bp	702 bp	943 bp	2572 bp	525 bp	596 bp	811 bp	648 bp	750 bp	739 bp
Polygonatum filipes	781 bp	1081 bp	694 bp	751 bp	746 bp	664 bp	1039 bp	877 bp	542 bp	737 bp	824 bp	701 bp	941 bp	2584 bp	533 bp	596 bp	819 bp	652 bp	753 bp	738 bp
Polygonatum franchetii	781 bp	1076 bp	694 bp	752 bp	751 bp	664 bp	1056 bp	867 bp	542 bp	738 bp	824 bp	702 bp	941 bp	2573 bp	533 bp	596 bp	808 bp	646 bp	747 bp	738 bp
Polygonatum hirtum	781 bp	1080 bp	694 bp	749 bp	746 bp	664 bp	1054 bp	877 bp	542 bp	740 bp	824 bp	702 bp	941 bp	2577 bp	533 bp	596 bp	813 bp	651 bp	751 bp	738 bp
Polygonatum hookeri	781 bp	1070 bp	694 bp	749 bp	751 bp	664 bp	1050 bp	867 bp	542 bp	741 bp	824 bp	702 bp	941 bp	2572 bp	533 bp	596 bp	808 bp	650 bp	749 bp	738 bp
Polygonatum hunanense	781 bp	1083 bp	694 bp	749 bp	746 bp	664 bp	1042 bp	865 bp	542 bp	740 bp	824 bp	702 bp	941 bp	2580 bp	525 bp	596 bp	811 bp	650 bp	750 bp	734 bp
Polygonatum inflatum	781 bp	1084 bp	694 bp	751 bp	746 bp	664 bp	1040 bp	877 bp	542 bp	740 bp	824 bp	701 bp	941 bp	2581 bp	533 bp	596 bp	810 bp	650 bp	746 bp	737 bp
Polygonatum involucratum	786 bp	1081 bp	694 bp	751 bp	746 bp	664 bp	1041 bp	877 bp	542 bp	738 bp	824 bp	701 bp	941 bp	2582 bp	533 bp	596 bp	812 bp	651 bp	752 bp	738 bp
Polygonatum kingianum	789 bp	1076 bp	694 bp	750 bp	751 bp	664 bp	1041 bp	866 bp	542 bp	741 bp	824 bp	702 bp	941 bp	2571 bp	533 bp	596 bp	811 bp	646 bp	750 bp	738 bp
Polygonatum macropodum	781 bp	1081 bp	694 bp	749 bp	746 bp	664 bp	1023 bp	877 bp	542 bp	737 bp	824 bp	701 bp	941 bp	2584 bp	533 bp	596 bp	812 bp	652 bp	752 bp	738 bp
Polygonatum multiflorum	781 bp	1081 bp	694 bp	753 bp	746 bp	664 bp	1023 bp	877 bp	542 bp	737 bp	824 bp	701 bp	941 bp	2583 bp	533 bp	596 bp	812 bp	649 bp	751 bp	738 bp
Polygonatum nodosum	781 bp	1081 bp	694 bp	753 bp	746 bp	664 bp	1039 bp	877 bp	542 bp	741 bp	824 bp	702 bp	941 bp	2580 bp	533 bp	596 bp	809 bp	651 bp	753 bp	738 bp
Polygonatum odoratum	781 bp	1081 bp	694 bp	751 bp	746 bp	664 bp	1021 bp	865 bp	542 bp	738 bp	824 bp	701 bp	941 bp	2582 bp	533 bp	596 bp	810 bp	651 bp	751 bp	738 bp
Polygonatum prattii	781 bp	1075 bp	694 bp	750 bp	751 bp	664 bp	1043 bp	867 bp	542 bp	739 bp	824 bp	702 bp	941 bp	2572 bp	533 bp	596 bp	809 bp	648 bp	750 bp	738 bp
Polygonatum punctatum	781 bp	1077 bp	694 bp	751 bp	751 bp	664 bp	1069 bp	868 bp	542 bp	731 bp	824 bp	702 bp	941 bp	2568 bp	533 bp	596 bp	809 bp	648 bp	749 bp	738 bp
Polygonatum sibiricum	789 bp	1081 bp	694 bp	751 bp	746 bp	664 bp	1046 bp	870 bp	537 bp	738 bp	824 bp	703 bp	940 bp	2575 bp	533 bp	596 bp	815 bp	657 bp	749 bp	738 bp
Polygonatum stenophyllum	781 bp	1075 bp	694 bp	749 bp	751 bp	664 bp	1060 bp	867 bp	542 bp	739 bp	824 bp	702 bp	941 bp	2572 bp	533 bp	596 bp	810 bp	647 bp	749 bp	738 bp
Polygonatum tessellatum	772 bp	1075 bp	694 bp	748 bp	751 bp	664 bp	1052 bp	892 bp	542 bp	740 bp	824 bp	703 bp	941 bp	2572 bp	533 bp	596 bp	809 bp	649 bp	751 bp	738 bp
Polygonatum uncinatum	789 bp	1076 bp	694 bp	750 bp	751 bp	664 bp	1045 bp	866 bp	542 bp	742 bp	824 bp	702 bp	941 bp	2571 bp	533 bp	596 bp	811 bp	649 bp	750 bp	738 bp
Polygonatum verticillatum	781 bp	1074 bp	694 bp	752 bp	751 bp	664 bp	1050 bp	867 bp	542 bp	739 bp	824 bp	702 bp	941 bp	2572 bp	533 bp	596 bp	807 bp	651 bp	749 bp	738 bp
Polygonatum zanlanscianense	781 bp	1074 bp	694 bp	750 bp	751 bp	664 bp	1051 bp	858 bp	542 bp	740 bp	824 bp	702 bp	941 bp	2573 bp	533 bp	596 bp	809 bp	648 bp	750 bp	738 bp
