# Supplementary material for: Comparative and Phylogenetic Analysis of the Complete Chloroplast Genomes of Six Polygonatum Species (Asparagaceae)
Source: Research Square preprint supplement (doi:10.21203/rs.3.rs-1669614/v1), 2022-05-31
Supplement: Supplementary file 9 [file 8371abde74ae34763b256369.docx]

**Table S9.** **The units of SSRs in the cp genome**

| SSR | **species** | | | | | | | | | |
| --- | --- | --- | --- | --- | --- | --- | --- | --- | --- | --- |
| *P. campanulatum* | *P. franchetii* | | *P. filipes* | *P. zanlanscianense* | *P. sibiricum* | *P. cyrtonema* | *P.*  *kingianum* | *H. alternicirrhosum* | *H. ginfushanicum* |
| A/T | 38 | | 37 | 28 | 32 | 30 | 28 | 33 | 39 | 34 |
| C/G | 0 | | 0 | 1 | 2 | 0 | 1 | 0 | 0 | 0 |
| TA/TA | 5 | | 5 | 4 | 3 | 4 | 4 | 5 | 4 | 4 |
| AT/AT | 3 | | 4 | 3 | 3 | 2 | 3 | 3 | 3 | 3 |
| TC/GA | 3 | | 3 | 3 | 3 | 3 | 2 | 3 | 3 | 3 |
| CAG/CTG | 1 | | 1 | 1 | 1 | 1 | 1 | 1 | 1 | 1 |
| TAA/TTA | 2 | | 2 | 1 | 2 | 1 | 1 | 3 | 1 | 1 |
| AAT/ATT | 0 | | 0 | 0 | 0 | 0 | 1 | 1 | 1 | 0 |
| TAT/ATA | 0 | | 0 | 0 | 0 | 0 | 1 | 0 | 0 | 0 |
| CATT/  AATG | 2 | | 2 | 2 | 2 | 2 | 2 | 2 | 2 | 2 |
| CAAT/  ATTG | 1 | | 0 | 1 | 1 | 0 | 1 | 2 | 1 | 1 |
| AATA/  TATT | 2 | | 2 | 2 | 2 | 2 | 1 | 2 | 1 | 1 |
| GAAT  /ATTC | 1 | | 1 | 1 | 1 | 1 | 1 | 1 | 1 | 1 |
| TTGA  /TCAA | 1 | | 1 | 1 | 1 | 1 | 1 | 1 | 1 | 1 |

| SSR | **species** | | | | | | | | |
| --- | --- | --- | --- | --- | --- | --- | --- | --- | --- |
| *P. campanulatum* | *P. franchetii* | *P. filipes* | *P. zanlanscianense* | *P. sibiricum* | *P. cyrtonema* | *P.*  *kingianum* | *H. alternicirrhosum* | *H. ginfushanicum* |
| TTAA/  TTAA | 0 | 0 | 0 | 0 | 0 | 0 | 0 | 1 | 0 |
| TAAA/  TTTA | 0 | 0 | 0 | 0 | 0 | 0 | 0 | 1 | 1 |
| AAAT/  ATTT | 0 | 0 | 0 | 0 | 1 | 0 | 0 | 0 | 0 |
| CGAAA/TTTCG | 2 | 2 | 2 | 2 | 2 | 2 | 2 | 2 | 2 |
| TAATA/  TATTA | 1 | 0 | 0 | 0 | 0 | 0 | 0 | 0 | 0 |
| AATAA/TTATT | 0 | 0 | 0 | 0 | 0 | 0 | 0 | 1 | 0 |
| CAATA/  TATTG | 0 | 0 | 0 | 0 | 0 | 0 | 0 | 1 | 0 |
| GAATAT/ATATTC | 0 | 0 | 1 | 0 | 0 | 0 | 0 | 0 | 0 |
| ATAGTA/TACTAT | 0 | 0 | 0 | 0 | 0 | 1 | 0 | 0 | 0 |

**Continuous the table**
