# Supplementary material for: Comparative and Phylogenetic Analysis of the Complete Chloroplast Genomes of Six Polygonatum Species (Asparagaceae)
Source: Research Square preprint supplement (doi:10.21203/rs.3.rs-1669614/v1), 2022-05-31
Supplement: Supplementary file 10 [file 8dcdf2b67cff2f3487e3c8ae.xlsx]

## Sheet: Sheet1
Amino acids	Codon	Polygonatum campanulatum			Polygonatum filipes			Polygonatum franchetii			Polygonatum zanlanscianense			Polygonatum cyrtonema			Polygonatum sibiricum			Polygonatum kingianum			Heteropolygonatum alternicirrhosum			Heteropolygonatum ginfushanicum
		No.	RSCU	Amino acid frequencies	No.	RSCU	Amino acid frequencies	No.	RSCU	Amino acid frequencies	No.	RSCU	Amino acid frequencies	No.	RSCU	Amino acid frequencies	No.	RSCU	Amino acid frequencies	No.	RSCU	Amino acid frequencies	No.	RSCU	Amino acid frequencies	No.	RSCU	Amino acid frequencies
*	UAA	38	1.31	0.00327228	39	1.34	0.0032756	38	1.31	0.00327055	39	1.34	0.00326442	41	1.4	0.00331925	40	1.36	0.00331925	40	1.38	0.00328885	40	1.36	0.003317	41	1.4	0.00331875
/终止	UAG	28	0.97		27	0.93		27	0.93		27	0.93		27	0.92		27	0.92		27	0.93		28	0.95		27	0.92
	UGA	21	0.72		21	0.72		22	0.76		21	0.72		20	0.68		21	0.72		20	0.69		20	0.68		20	0.68
Ala/A	GCU	636	1.8	0.0532967	635	1.8	0.0532003	636	1.8	0.0532687	635	1.8	0.0530562	638	1..81	0.0531835	634	1.79	0.0532966	635	1.8	0.053	631	1.79	0.0533399	629	1.79	0.0530623
	GCC	219	0.62		218	0.62		220	0.62		219	0.62		216	0.61		221	0.63		219	0.62		219	0.62		219	0.62
	GCA	421	1.19		415	1.17		419	1.18		417	1.18		410	1.16		415	1.17		415	1.18		414	1.18		417	1.19
	GCG	141	0.4		145	0.41		142	0.4		143	0.4		146	0.41		143	0.4		142	0.4		143	0.41		142	0.4
Cys/C	UGU	235	1.54	0.0115094	238	1.55	0.0115964	237	1.54	0.0115409	238	1.55	0.0115193	240	1.56	0.0116174	239	1.56	0.0115797	238	1.56	0.012	239	1.55	0.0115677	240	1.55	0.012
	UGC	71	0.46		70	0.45		70	0.46		69	0.45		68	0.44		68	0.44		68	0.44		69	0.45		69	0.45
Asp/D	GAU	861	1.59	0.0407342	875	1.6	0.0412274	872	1.6	0.0410887	885	1.59	0.0417245	872	1.59	0.0413775	874	1.59	0.0414152	879	1.59	0.042	873	1.59	0.0416966	873	1.6	0.041
	GAC	222	0.41		220	0.4		221	0.4		227	0.41		225	0.41		224	0.41		224	0.41		222	0.41		221	0.4
Glu/E	GAA	1032	1.49	0.0521307	1029	1.49	0.0520331	1035	1.49	0.0522913	1033	1.49	0.0521932	1020	1.48	0.0520519	1023	1.48	0.0520142	1020	1.48	0.052	1024	1.48	0.0520546	1021	1.48	0.0520818
	GAG	354	0.51		353	0.51		356	0.51		358	0.51		360	0.52		356	0.52		357	0.52		361	0.52		360	0.52
Phe/F	UUU	928	1.23	0.0569075	925	1.22	0.0568901	930	1.23	0.0568776	935	1.23	0.0569209	922	1.23	0.0567667	921	1.23	0.0565782	926	1.23	0.0567421	925	1.23	0.0567659	928	1.23	0.0570222
	UUC	585	0.77		586	0.78		583	0.77		582	0.77		583	0.77		579	0.77		575	0.77		581	0.77		584	0.77
Gly/G	GGU	585	1.31	0.0671005	586	1.31	0.0674699	584	1.31	0.0672907	587	1.31	0.0672395	588	1.31	0.0678561	589	1.31	0.0680069	584	1.3	0.067705	588	1.3	0.0679608	586	1.3	0.0680344
	GGC	171	0.38		175	0.39		171	0.38		171	0.38		171	0.38		171	0.38		171	0.38		173	0.38		173	0.38
	GGA	726	1.63		733	1.64		729	1.63		730	1.63		735	1.63		736	1.63		729	1.63		732	1.62		733	1.63
	GGG	302	0.68		298	0.67		306	0.68		304	0.68		305	0.68		307	0.68		307	0.69		310	0.69		312	0.69
His/H	CAU	524	1.53	0.0257269	521	1.53	0.0255648	522	1.53	0.0256005	523	1.53	0.02559	519	1.53	0.025611	519	1.53	0.0255733	523	1.53	0.0257816	521	1.53	0.0256314	520	1.54	0.025494
	CAC	160	0.47		158	0.47		159	0.47		159	0.47		160	0.47		159	0.47		159	0.47		159	0.47		156	0.46
Ile/I	AUU	1103	1.44	0.0862452	1099	1.44	0.0864834	1097	1.44	0.0861246	1103	1.44	0.0864508	1093	1.43	0.0862251	1092	1.44	0.0860365	1088	1.43	0.0862662	1095	1.44	0.086242	1091	1.43	0.0860235
	AUC	461	0.6		471	0.62		469	0.61		472	0.61		470	0.62		468	0.62		471	0.62		469	0.61		469	0.62
	AUA	729	0.95		727	0.95		725	0.95		729	0.95		723	0.95		721	0.95		723	0.95		724	0.95		721	0.95
Lys/K	AAA	1033	1.49	0.0522812	1028	1.49	0.0519578	1036	1.49	0.0522537	1034	1.49	0.0522307	1020	1.49	0.0517124	1019	1.49	0.051637	1026	1.49	0.052	1026	1.49	0.0518281	1023	1.49	0.0517801
	AAG	357	0.51		352	0.51		354	0.51		358	0.51		351	0.51		350	0.51		348	0.51		349	0.51		350	0.51
Leu/L	UUA	844	1.85	0.102682	840	1.85	0.102523	842	1.85	0.10274	847	1.86	0.102773	831	1.84	0.102482	833	1.84	0.102595	834	1.85	0.101992	833	1.84	0.102262	833	1.84	0.102466
	UUG	563	1.24		569	1.25		569	1.25		567	1.24		565	1.25		565	1.25		558	1.24		562	1.24		561	1.24
	CUU	576	1.27		568	1.25		573	1.26		577	1.26		573	1.27		573	1.26		572	1.27		573	1.27		576	1.27
	CUC	197	0.43		195	0.43		200	0.44		202	0.44		203	0.45		206	0.45		196	0.44		205	0.45		203	0.45
	CUA	386	0.85		386	0.85		385	0.85		382	0.84		379	0.84		378	0.83		374	0.83		373	0.82		379	0.84
	CUG	164	0.36		165	0.36		164	0.36		164	0.36		166	0.37		165	0.36		164	0.36		167	0.37		165	0.36
Met /M	AUG	633	1	0.0238086	632	1	0.023771	634	1	0.0238462	634	1	0.0238462	633	1	0.023876	635	1	0.0239514	635	1	0.0240048	635	1	0.0239352	639	1	0.0240987
Asn/N	AAU	967	1.51	0.0481814	960	1.51	0.0479669	958	1.51	0.0478178	962	1.51	0.0478406	957	1.52	0.0476388	954	1.52	0.0474879	952	1.51	0.0475938	955	1.51	0.0476065	962	1.52	0.0478202
	AAC	314	0.49		314	0.49		314	0.49		313	0.49		306	0.48		305	0.48		307	0.49		308	0.49		306	0.48
Pro/P	CCU	405	1.48	0.0412232	408	1.48	0.041378	407	1.49	0.0411263	404	1.48	0.0410866	407	1.48	0.0413775	406	1.48	0.0413398	408	1.49	0.0413564	408	1.49	0.0413871	407	1.49	0.0412958
	CCC	231	0.84		232	0.84		229	0.84		230	0.84		234	0.85		234	0.85		229	0.84		232	0.85		232	0.85
	CCA	324	1.18		318	1.16		321	1.17		322	1.18		317	1.16		321	1.17		321	1.17		322	1.17		320	1.17
	CCG	136	0.5		141	0.51		137	0.5		139	0.51		139	0.51		135	0.49		136	0.5		136	0.5		136	0.5
Gln/Q	CAA	703	1.51	0.0350547	703	1.51	0.0351657	700	1.51	0.0349611	705	1.51	0.0350081	696	1.5	0.0350785	703	1.5	0.0353802	699	1.5	0.0351567	704	1.5	0.0353185	701	1.5	0.0353372
	CAG	229	0.49		231	0.49		230	0.49		228	0.49		234	0.5		235	0.5		231	0.5		233	0.5		236	0.5
Arg/R	CGU	364	1.32	0.0620604	366	1.33	0.0621235	365	1.32	0.0621405	365	1.32	0.0620615	367	1.34	0.0621982	364	1.33	0.0620851	363	1.33	0.0621102	366	1.33	0.062	366	1.33	0.062043
	CGC	86	0.31		86	0.31		87	0.32		89	0.32		87	0.32		86	0.31		87	0.32		86	0.31		86	0.31
	CGA	359	1.31		367	1.33		365	1.32		364	1.32		362	1.32		361	1.32		358	1.31		357	1.3		358	1.31
	CGG	133	0.48		131	0.48		131	0.48		134	0.49		132	0.48		132	0.48		133	0.49		135	0.49		134	0.49
	AGA	538	1.96		532	1.93		538	1.95		536	1.94		528	1.92		530	1.93		531	1.94		529	1.93		529	1.93
	AGG	170	0.62		168	0.61		167	0.61		166	0.6		173	0.63		173	0.63		171	0.62		173	0.63		172	0.63
Ser/S	UCU	582	1.67	0.0786098	582	1.68	0.0783133	584	1.67	0.0786813	585	1.67	0.0787212	579	1.65	0.0792094	583	1.66	0.0792849	582	1.67	0.0788568	577	1.65	0.0790049	579	1.66	0.0789335
	UCC	350	1		348	1		353	1.01		356	1.02		362	1.03		357	1.02		353	1.02		360	1.03		360	1.03
	UCA	437	1.25		432	1.25		430	1.23		429	1.23		435	1.24		436	1.24		427	1.23		434	1.24		434	1.24
	UCG	197	0.57		196	0.57		198	0.57		200	0.57		200	0.57		201	0.57		199	0.57		204	0.58		200	0.57
	AGU	416	1.19		414	1.19		419	1.2		419	1.2		410	1.17		412	1.18		416	1.2		409	1.17		408	1.17
	AGC	108	0.31		108	0.31		109	0.31		109	0.31		114	0.33		113	0.32		109	0.31		112	0.32		112	0.32
Thr/T	ACU	537	1.59	0.0508143	540	1.6	0.0508283	534	1.58	0.0506748	536	1.59	0.0506548	538	1.6	0.0506563	536	1.6	0.0505054	536	1.6	0.0506559	537	1.6	0.0506596	536	1.6	0.0505732
	ACC	248	0.73		249	0.74		247	0.73		248	0.73		248	0.74		248	0.74		245	0.73		247	0.74		247	0.74
	ACA	415	1.23		410	1.21		412	1.22		413	1.22		407	1.21		407	1.22		410	1.22		411	1.22		411	1.23
	ACG	151	0.45		151	0.45		155	0.46		153	0.45		150	0.45		148	0.44		149	0.44		149	0.44		147	0.44
Val/V	GUU	521	1.44	0.0543123	523	1.45	0.0541792	526	1.45	0.0545092	522	1.45	0.0541818	520	1.45	0.0540133	521	1.45	0.0541642	525	1.46	0.0543606	526	1.46	0.0542782	523	1.46	0.0541183
	GUC	185	0.51		178	0.49		185	0.51		185	0.51		174	0.49		176	0.49		175	0.49		176	0.49		173	0.48
	GUA	540	1.5		537	1.49		543	1.5		540	1.5		537	1.5		538	1.5		539	1.5		537	1.49		539	1.5
	GUG	198	0.55		201	0.56		196	0.54		197	0.55		201	0.56		201	0.56		199	0.55		201	0.56		200	0.56
Trp/W	UGG	466	1	0.0175274	466	1	0.0175452	467	1	0.0175557	465	1	0.0174478	464	1	0.0175015	465	1	0.0175392	461	1	0.0174271	463	1	0.0174519	463	1	0.0174612
Tyr/Y	UAU	772	1.59	0.0365216	768	1.59	0.0364834	766	1.58	0.036352	767	1.59	0.0362463	762	1.59	0.0362477	761	1.59	0.03621	758	1.59	0.0361018	764	1.59	0.0361855	761	1.59	0.0361291
	UAC	199	0.41		201	0.41		201	0.42		199	0.41		199	0.41		199	0.41		197	0.41		196	0.41		197	0.41
