# Supplementary material for: Comparative and Phylogenetic Analysis of the Complete Chloroplast Genomes of Six Polygonatum Species (Asparagaceae)
Source: Research Square preprint supplement (doi:10.21203/rs.3.rs-1669614/v1), 2022-05-31
Supplement: Supplementary file 11 [file f884ec9321c05137153b5ae7.xlsx]

## Sheet: Sheet1
	species	NCBI number	分子样编号	备注
	Heteropolygonatum alternicirrhosum	MZ150832
	Heteropolygonatum ginfushanicum	MW363694
	Heteropolygonatum ogisui	MZ150833
	Maianthemum henryi	NC_057254
	Polygonatum acuminatifolium 2	MH891751		UV
	Polygonatum acuminatifolium1	MZ150867
	Polygonatum acuminatifolium3	NC_058569.1
	Polygonatum annamense	MH891738		UV
	Polygonatum biflorum	MH891756		UV
	Polygonatum campanulatum		2259
	Polygonatum cirrhifolium1	MZ150836.1
	Polygonatum cirrhifolium2	MZ029092
	Polygonatum cirrhifolium3	MZ150834
	Polygonatum cirrhifolium4	MZ150835
	Polygonatum curvistylum1	MZ150837.1
	Polygonatum curvistylum2	NC_058554.1
	Polygonatum cyrtonema1	OL436258.1
	Polygonatum cyrtonema2	MZ150838.1
	Polygonatum cyrtonema3	MZ150839.1
	Polygonatum cyrtonema4	MZ150840.1
	Polygonatum cyrtonema5	MZ029094.1
	Polygonatum cyrtonema		2364
	Polygonatum filipes1		1359
	Polygonatum filipes2	MZ150841
	Polygonatum filipes3	MZ150843
	Polygonatum filipes4	MZ150842
	Polygonatum filipes5	NC_058555.1
	Polygonatum franchetii		1223
	Polygonatum govanianum	MH891755		UV
	Polygonatum hirtum1	MZ150844
	Polygonatum hirtum2	NC_058556
	Polygonatum hookeri1	NC_058557
	Polygonatum hookeri2	MZ150845.1
	Polygonatum hookeri3	MZ150846.1
	Polygonatum huanum	MH891743		UV
	Polygonatum humile1	MN218691
	Polygonatum humile2	MZ150847
	Polygonatum inflatum1	NC_058559.1
	Polygonatum inflatum2	MZ150848.1
	Polygonatum involucratum1	NC_058560
	Polygonatum involucratum2	MZ150851
	Polygonatum jinzhaiense1	NC_058561
	Polygonatum jinzhaiense2	MZ150853.1
	Polygonatum kingianum1	MW373517
	Polygonatum kingianum2	MN873571.1
	Polygonatum macropodum1	MZ150854.1
	Polygonatum macropodum2	NC_058562
	Polygonatum mengtzense	MH891741		UV
	Polygonatum multiflorum1	MZ150855
	Polygonatum multiflorum2	MZ150856
	Polygonatum nodosum	NC_058564
	Polygonatum odoratum 1	MW248130
	Polygonatum odoratum 2	MZ150858.1
	Polygonatum orientale	MH891753		UV
	Polygonatum prattii	NC_058565
	Polygonatum punctatum1	MH891739		UV
	Polygonatum punctatum2	NC_058566
	Polygonatum sibiricum_b		1379	北方
	Polygonatum sibiricum_n		1401_3_3	湖南
	Polygonatum sibiricum_sxjc		1386	山西晋城
	Polygonatum sibiricum1	MZ_029093
	Polygonatum sibiricum2	NC_029485
	Polygonatum sibiricum3	KT695605.1
	Polygonatum sibiricum4	MZ029093.1
	Polygonatum stenophyllum	KX822773
	Polygonatum stewartianum	MH891749		UV
	Polygonatum tessellatum1	NC_0585671
	Polygonatum tessellatum2	MZ1508631
	Polygonatum tessellatum3	MH891747		UV
	Polygonatum uncinatum1	MH891744		UV
	Polygonatum uncinatum2	MZ150864.1
	Polygonatum uncinatum3	NC_058568.1
	Polygonatum urceolatum	MH891742		UV
	Polygonatum verticillatum1	MZ150865
	Polygonatum verticillatum2	NC_028523
	Polygonatum verticillatum3	MZ150866
	Polygonatum verticillatum4	KT722981
	Polygonatum yunnanense	MH891754		UV
	Polygonatum zanlanscianense1357		1357
	Polygonatum zanlanscianense2	NC_058227
	Polygonatum zanlanscianense3	MW800891.1
	Polygonatum zanlanscianense4	MW373522.1
	Polygonatum hunanense	MW373518.1
	Polygonatum oppositifolium	MH891746.1		UV
	Polygonatum pubescens	MH891757.1

## Sheet: Sheet1 (2)
species	Accession number	Remark
Heteropolygonatum alternicirrhosum	MZ150832	/
Heteropolygonatum ginfushanicum	MW363694	/
Heteropolygonatum marmoratum	MH891735	UNVERIFIED
Heteropolygonatum ogisui	MZ150833	/
Heteropolygonatum pendulum	MH891736	UNVERIFIED
Maianthemum henryi	NC_057254	/
Polygonatum acuminatifolium	MZ150867	/
Polygonatum annamense	MH891738	UNVERIFIED
Polygonatum biflorum	MH891756	UNVERIFIED
Polygonatum campanulatum	ON534060	/
Polygonatum cirrhifolium	MZ150836	/
Polygonatum curvistylum	MZ150837	/
Polygonatum cyrtonema1	ON534061	/
Polygonatum cyrtonema2	MZ150838	/
Polygonatum cyrtonema3	MZ150839	/
Polygonatum cyrtonema4	MZ150840	/
Polygonatum cyrtonema5	MZ029094	/
Polygonatum cyrtonema6	OL436258	/
Polygonatum filipes1	ON534062	/
Polygonatum filipes2	MZ150841	/
Polygonatum filipes3	MZ150843	/
Polygonatum filipes4	MZ150842	/
Polygonatum filipes5	NC_058555	/
Polygonatum franchetii	ON534063	/
Polygonatum govanianum	MH891755	UNVERIFIED
Polygonatum hirtum	MZ150844	/
Polygonatum hookeri	NC_058557	/
Polygonatum huanum	MH891743	UNVERIFIED
Polygonatum hunanense	MW373518	/
Polygonatum inflatum	NC_058559	/
Polygonatum involucratum	NC_058560	/
Polygonatum kingianum	MW373517	/
Polygonatum macropodum	MZ150854	/
Polygonatum mengtzense	MH891741	UNVERIFIED
Polygonatum multiflorum	MZ150856	/
Polygonatum nodosum	NC_058564	/
Polygonatum odoratum	MW248130	/
Polygonatum oppositifolium	MH891746	UNVERIFIED
Polygonatum orientale	MH891753	UNVERIFIED
Polygonatum prattii	NC_058565	/
Polygonatum pubescens	MH891757	UNVERIFIED
Polygonatum punctatum	NC_058566	/
Polygonatum sibiricum1	ON534064	/
Polygonatum sibiricum2	NC_029485	/
Polygonatum sibiricum3	KT695605	/
Polygonatum sibiricum4	MZ029093	/
Polygonatum sibiricum5	MZ029093	/
Polygonatum stenophyllum	KX822773	/
Polygonatum stewartianum	MH891749	UNVERIFIED
Polygonatum tessellatum1	NC_0585671	/
Polygonatum tessellatum2	MZ150863	/
Polygonatum tessellatum3	MH891747	UNVERIFIED
Polygonatum uncinatum	MZ150864	/
Polygonatum urceolatum	MH891742	UNVERIFIED
Polygonatum verticillatum1	MZ150865	/
Polygonatum verticillatum2	MZ150866	/
Polygonatum yunnanense	MH891754	UNVERIFIED
Polygonatum zanlanscianense1	ON534059	/
Polygonatum zanlanscianense2	NC_058227	/
Polygonatum zanlanscianense3	MW373522	/
		UNVERIFIED：The sequence failed to be verified in NCBI
